# Supplementary material
Source: PubMed Central journal article supplement (PMC3003409)

### SUPPLEMENTARY FIGURE

Supplementary Figure 1. The expression of FcR $\gamma$  by retroviral transfection. Flow cytometric analysis of surface expression of rCD2-FcR $\gamma$  after MACS separation (left, WT; right, YF).

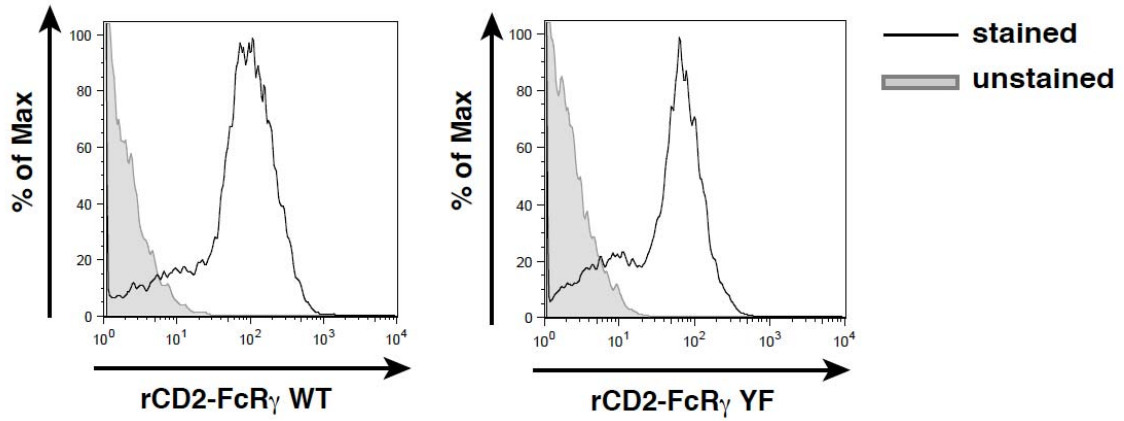

Supplement: supp_M110.175497_jbc.M110.175497-1.pdf [file supp_M110.175497_jbc.M110.175497-1.pdf]
